# Supplementary material for: Copper(II) and Platinum(II) Naproxenates: Insights on Synthesis, Characterization and Evaluation of Their Antiproliferative Activities
Source: MDPI journal article supplement (doi:10.3390/inorganics11080331), 2023-08-10
Supplement: s1 [file s1]

## Supplementary Material

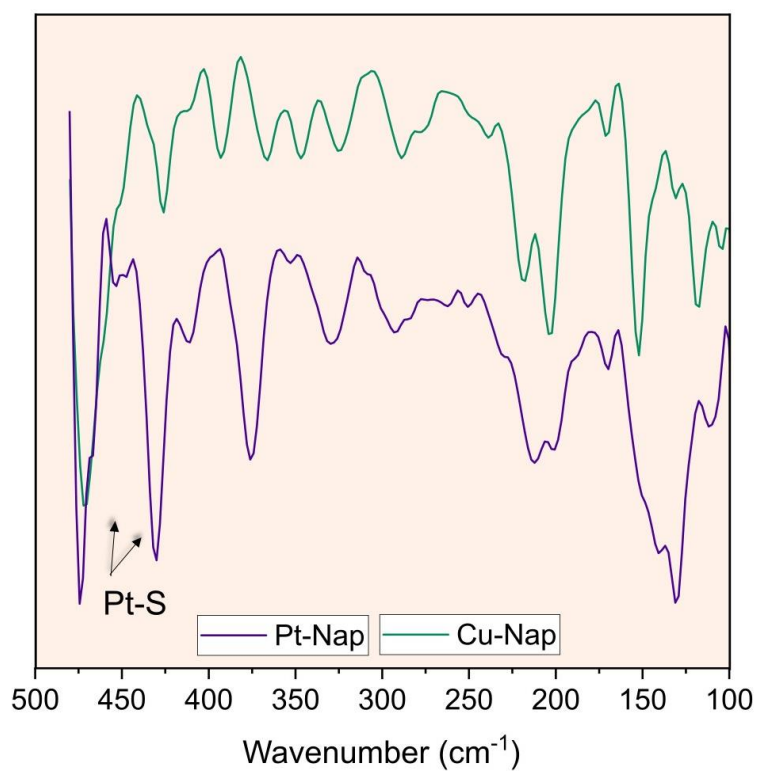

**Figure S1.** Far ATR-FTIR spectra of Cu-Nap and Pt-Nap from 100-500 $\text{cm}^{-1}$ .

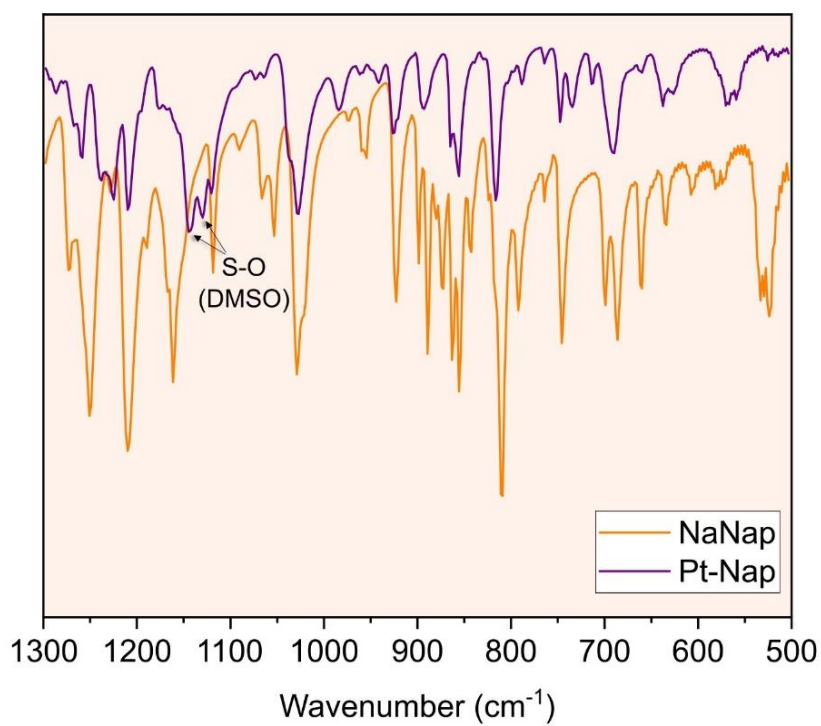

**Figure S2.** ATR-FTIR of Pt-Nap and NaNap from 1300 to 500  $\text{cm}^{-1}$ .

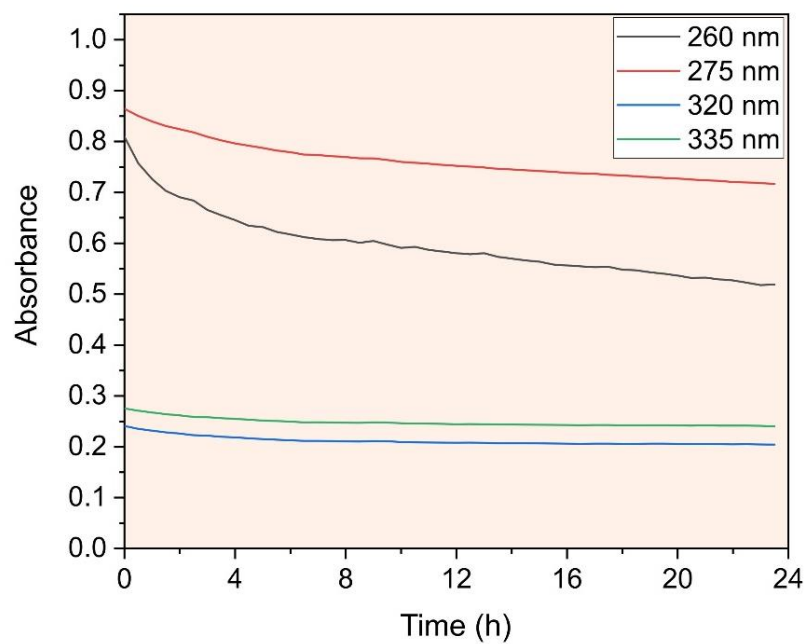

**Figure S3.** Kinetic UV-Vis of Cu-Nap in 24h at absorbances peaks 260, 275, 320 and 335 nm.

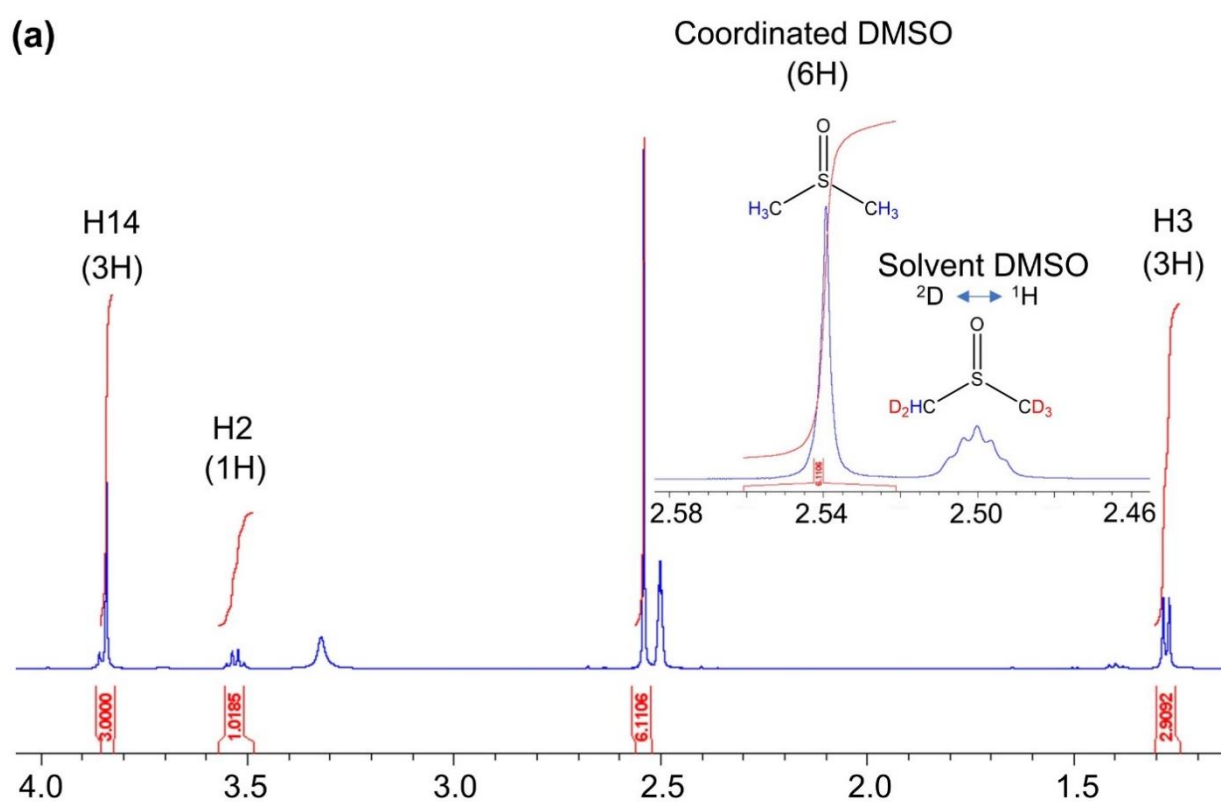

**Figure S4.**  $^1\text{H}$  NMR with integrals. Inset shows both DMSO signals, coordinated in Pt-Nap and solvent
